# Supplementary material
Source: PubMed Central journal article supplement (PMC7581227)
Supplement: ao0c03252_si_001.pdf [file ao0c03252_si_001.pdf]

## *Supporting Information*

### *Single nanocrystal studies on the homogeneity of the optical properties of NaYF<sub>4</sub>:Yb<sup>3+</sup>, Er<sup>3+</sup>*

*Bartosz Krajnik<sup>\*a</sup>, Lukasz W. Golacki<sup>a</sup>, Uliana Kostiv<sup>b</sup>, Daniel Horák<sup>b</sup>, and Artur Podhorodecki<sup>\*a</sup>*

*<sup>a</sup>) Department of Experimental Physics, Wrocław University of Science and Technology, Wyb. Wyspińskiego 27, 50-370 Wrocław, Poland*

*<sup>b</sup>) Institute of Macromolecular Chemistry, Czech Academy of Sciences, Heyrovského nám. 2, 162 06 Prague 6, Czech Republic*

*\*Corresponding authors: [bartosz.krajnik@pwr.edu.pl](mailto:bartosz.krajnik@pwr.edu.pl), [artur.p.podhorodecki@pwr.edu.pl](mailto:artur.p.podhorodecki@pwr.edu.pl)*

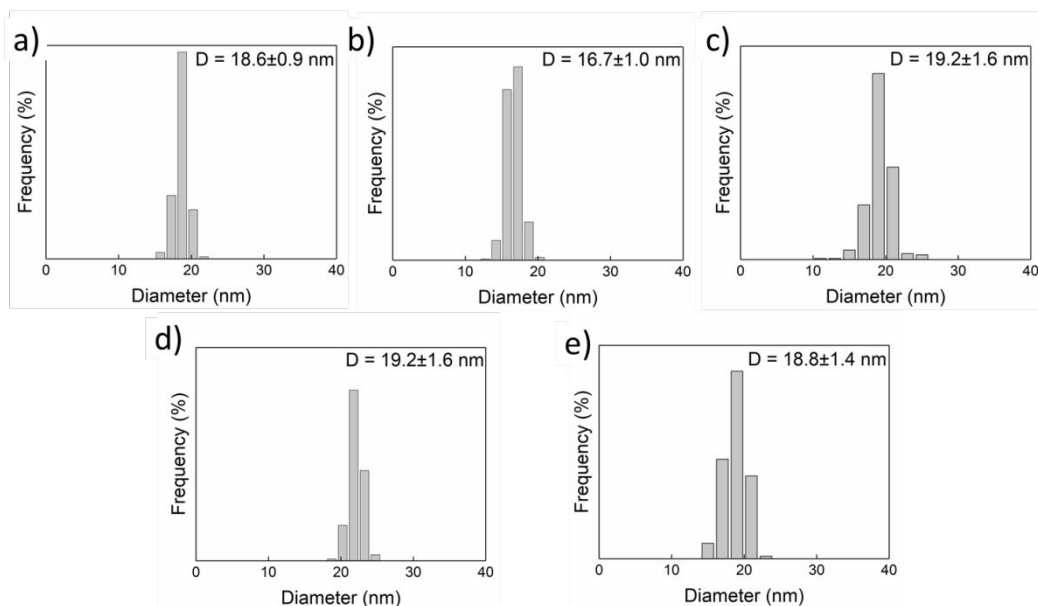

Figure S1. Size distribution histograms of NaYF<sub>4</sub>:Yb<sup>3+</sup>, Er<sup>3+</sup> (2 mol%) nanocrystals with different Yb<sup>3+</sup> concentrations: (a) 5, (b) 10, (c) 15, (d) 20, and (e) 30 mol%.

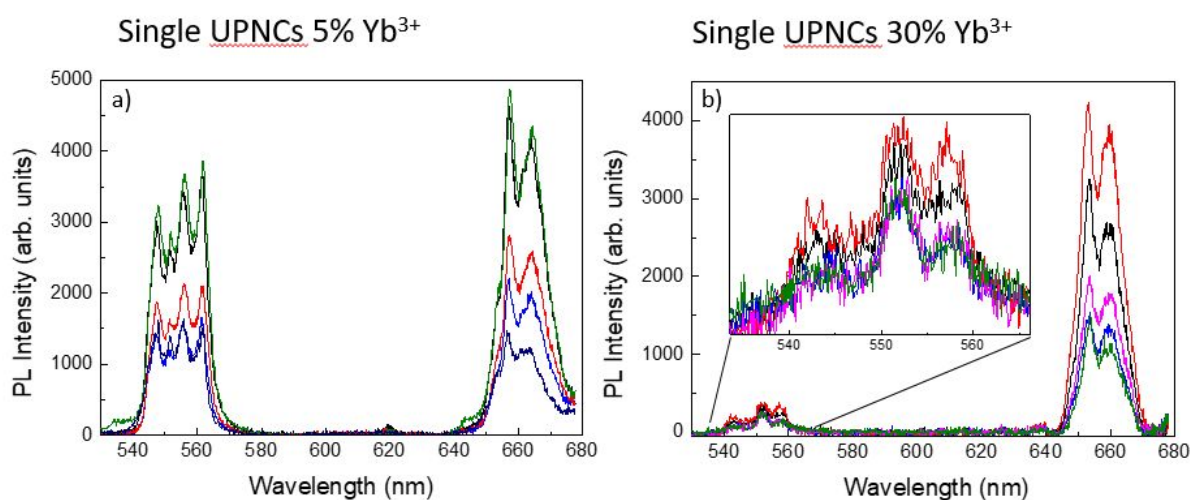

Figure S2. Single UPNCs photoluminescence spectra for 5% (a) and 30% (b) Yb<sup>3+</sup> concentration.

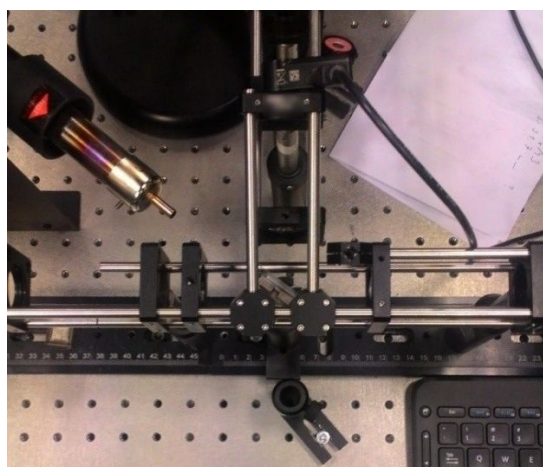

Figure S3. Glass coverslip with UPNCs was heated with a hot air gun. The temperature of the substrate was continuously monitored with a thermographic camera.

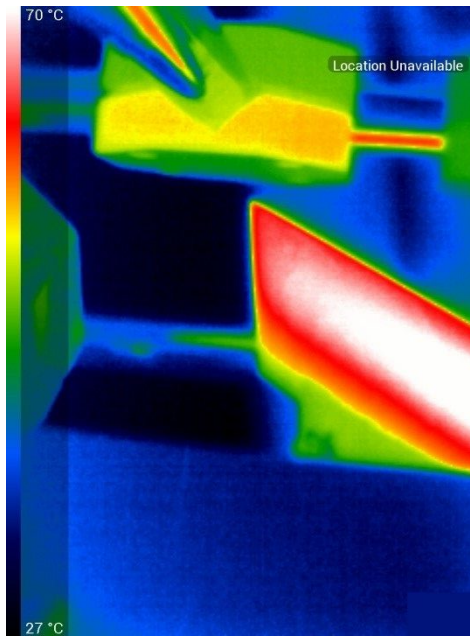

Figure S4. Thermographic image of glass coverslip (red/white rectangle) covered with UPNCs.
